# Supplementary material for: Bidirectional Effects of Mao Jian Green Tea and Its Flavonoid Glycosides on Gastrointestinal Motility
Source: MDPI journal article supplement (doi:10.3390/foods12040854), 2023-02-16
Supplement: s1 [file s1]

Table S2. Flavonoids identified by UPLC-ESI-MS in MJGT hydro extracts

| <i>No.</i> | <i>Peak No.</i> | <i>Retetion time</i> | <i>Identification Commpond</i> | <i>Molecular Weight</i> | <i>Ion mode</i>    | <i>ppm</i> | <i>MS</i> | <i>MS2</i>                              |
|------------|-----------------|----------------------|--------------------------------|-------------------------|--------------------|------------|-----------|-----------------------------------------|
| 1          | A               | 15.53                | eriodictyol-7-O-glucoside      | 450.11566               | [M-H] <sup>-</sup> | 3.150      | 449.10828 | 287.05640/135.04533/151.00388/175.00385 |
| 2          | B               | 18.10                | luteolin-7-O- glucoside        | 448.10001               | [M-H] <sup>-</sup> | 3.358      | 447.09369 | 285.04022/284.03290/327.05228           |
| 3          | C               | 22.20                | eriodictyol                    | 288.06284               | [M-H] <sup>-</sup> | 4.708      | 287.05627 | 107.01394/135.04533/151.00385           |
| 4          | D               | 26.84                | luteolin                       | 286.04719               | [M-H] <sup>-</sup> | 4.615      | 285.04071 | 133.02963/151.00385/175.04024/199.04041 |
