# Supplementary material for: Bidirectional Effects of Mao Jian Green Tea and Its Flavonoid Glycosides on Gastrointestinal Motility
Source: MDPI journal article supplement (doi:10.3390/foods12040854), 2023-02-16
Supplement: s1 [file s1]

Table S1. The concentrations of hydro extracts or flavonoids used in muscle contractility test *in vitro*

| <i>Compound<br/>(MW)</i>                  | <i>Sample</i> | <i>Initial<br/>concentration<br/>(mg/mL)</i> | <i>Added<br/>volume<br/>(μL)</i> | <i>Final<br/>volume<br/>(mL)</i> | <i>Final<br/>concentration<br/>(μg/mL)</i> | <i>Final<br/>concentration<br/>(μmol/L)</i> |
|-------------------------------------------|---------------|----------------------------------------------|----------------------------------|----------------------------------|--------------------------------------------|---------------------------------------------|
| luteolin<br>(286.24)                      | L             | 0.034                                        | 80.00                            | 20.08                            | 0.135                                      | 0.473                                       |
|                                           | M             | 0.034                                        | 160.00                           | 20.16                            | 0.270                                      | 0.943                                       |
|                                           | H             | 0.034                                        | 320.00                           | 20.32                            | 0.535                                      | 1.871                                       |
|                                           | S1            | 0.200                                        | 80.00                            | 20.08                            | 0.797                                      | 2.784                                       |
|                                           | S2            | 0.200                                        | 160.00                           | 20.16                            | 1.587                                      | 5.545                                       |
|                                           | S3            | 0.200                                        | 320.00                           | 20.32                            | 3.150                                      | 11.003                                      |
|                                           | S4            | 0.200                                        | 640.00                           | 20.64                            | 6.202                                      | 21.666                                      |
|                                           | S5            | 0.200                                        | 1280.00                          | 21.28                            | 12.030                                     | 42.028                                      |
| luteolin-7-O-<br>glucoside<br>(448.38)    | L             | 0.216                                        | 80.00                            | 20.08                            | 0.861                                      | 1.920                                       |
|                                           | M             | 0.216                                        | 160.00                           | 20.16                            | 1.714                                      | 3.823                                       |
|                                           | H             | 0.216                                        | 320.00                           | 20.32                            | 3.402                                      | 7.587                                       |
|                                           | S1            | 0.200                                        | 80.00                            | 20.08                            | 0.797                                      | 1.778                                       |
|                                           | S2            | 0.200                                        | 160.00                           | 20.16                            | 1.587                                      | 3.539                                       |
|                                           | S3            | 0.200                                        | 320.00                           | 20.32                            | 3.150                                      | 7.025                                       |
|                                           | S4            | 0.200                                        | 640.00                           | 20.64                            | 6.202                                      | 13.832                                      |
|                                           | S5            | 0.200                                        | 1280.00                          | 21.28                            | 12.030                                     | 26.830                                      |
| eriodictyol<br>(288.25)                   | L             | 0.152                                        | 80.00                            | 20.08                            | 0.606                                      | 2.101                                       |
|                                           | M             | 0.152                                        | 160.00                           | 20.16                            | 1.206                                      | 4.185                                       |
|                                           | H             | 0.152                                        | 320.00                           | 20.32                            | 2.394                                      | 8.304                                       |
|                                           | S1            | 0.200                                        | 80.00                            | 20.08                            | 0.797                                      | 2.764                                       |
|                                           | S2            | 0.200                                        | 160.00                           | 20.16                            | 1.587                                      | 5.507                                       |
|                                           | S3            | 0.200                                        | 320.00                           | 20.32                            | 3.150                                      | 10.927                                      |
|                                           | S4            | 0.200                                        | 640.00                           | 20.64                            | 6.202                                      | 21.514                                      |
|                                           | S5            | 0.200                                        | 1280.00                          | 21.28                            | 12.030                                     | 41.735                                      |
| eriodictyol-7-<br>O-glucoside<br>(450.39) | L             | 0.637                                        | 80.00                            | 20.08                            | 2.538                                      | 5.635                                       |
|                                           | M             | 0.637                                        | 160.00                           | 20.16                            | 5.056                                      | 11.225                                      |
|                                           | H             | 0.637                                        | 320.00                           | 20.32                            | 10.031                                     | 22.273                                      |
|                                           | S1            | 0.200                                        | 80.00                            | 20.08                            | 0.797                                      | 1.769                                       |
|                                           | S2            | 0.200                                        | 160.00                           | 20.16                            | 1.587                                      | 3.524                                       |
|                                           | S3            | 0.200                                        | 320.00                           | 20.32                            | 3.150                                      | 6.993                                       |
|                                           | S4            | 0.200                                        | 640.00                           | 20.64                            | 6.202                                      | 13.769                                      |
|                                           | S5            | 0.200                                        | 1280.00                          | 21.28                            | 12.030                                     | 26.710                                      |
