# Supplementary material for: Bidirectional Effects of Mao Jian Green Tea and Its Flavonoid Glycosides on Gastrointestinal Motility
Source: MDPI journal article supplement (doi:10.3390/foods12040854), 2023-02-16
Supplement: s1 [file s1]

Table S3. Regression equations and the corresponding reliability of four flavonoid standards

| <i>Compound</i>           | <i>Regression equation</i> | <i>R</i> <sup>2</sup> | <i>Linear ranges</i><br>( $\mu\text{g/mL}$ ) | <i>LOD</i><br>( $\mu\text{g/mL}$ ) | <i>LQD</i><br>( $\mu\text{g/mL}$ ) | <i>Precisio</i><br>( <i>n</i> =6) | <i>Repeatability</i><br>( <i>n</i> =6) | <i>Accuracy</i> ( <i>n</i> =6) |                     |
|---------------------------|----------------------------|-----------------------|----------------------------------------------|------------------------------------|------------------------------------|-----------------------------------|----------------------------------------|--------------------------------|---------------------|
|                           |                            |                       |                                              |                                    |                                    | <i>RSD</i> (%)                    | <i>RSD</i> (%)                         | <i>RSD</i> (%)                 | <i>Recovery</i> (%) |
| eriodictyol               | Y=32264X-8.1381            | 0.9998                | 2.5~250                                      | 0.3333                             | 1.0000                             | 1.18%                             | 0.69%                                  | 3.22%                          | 94.8%               |
| eriodictyol-7-O-glucoside | Y=23680X+29.012            | 0.9991                | 4~400                                        | 0.0833                             | 0.3333                             | 1.09%                             | 1.24%                                  | 2.24%                          | 96.04%              |
| luteolin                  | Y=16091X-21.205            | 0.9995                | 1.96~196                                     | 0.2500                             | 0.8000                             | 1.35%                             | 1.24%                                  | 2.13%                          | 98.56%              |
| luteolin-7-O-glucoside    | Y=20785X+2.6562            | 0.9994                | 2.2~220                                      | 0.0270                             | 0.0813                             | 1.70%                             | 1.26%                                  | 2.72%                          | 100.58%             |
