# Supplementary figures and images for: Bidirectional Effects of Mao Jian Green Tea and Its Flavonoid Glycosides on Gastrointestinal Motility
Source: MDPI journal article supplement (doi:10.3390/foods12040854), 2023-02-16

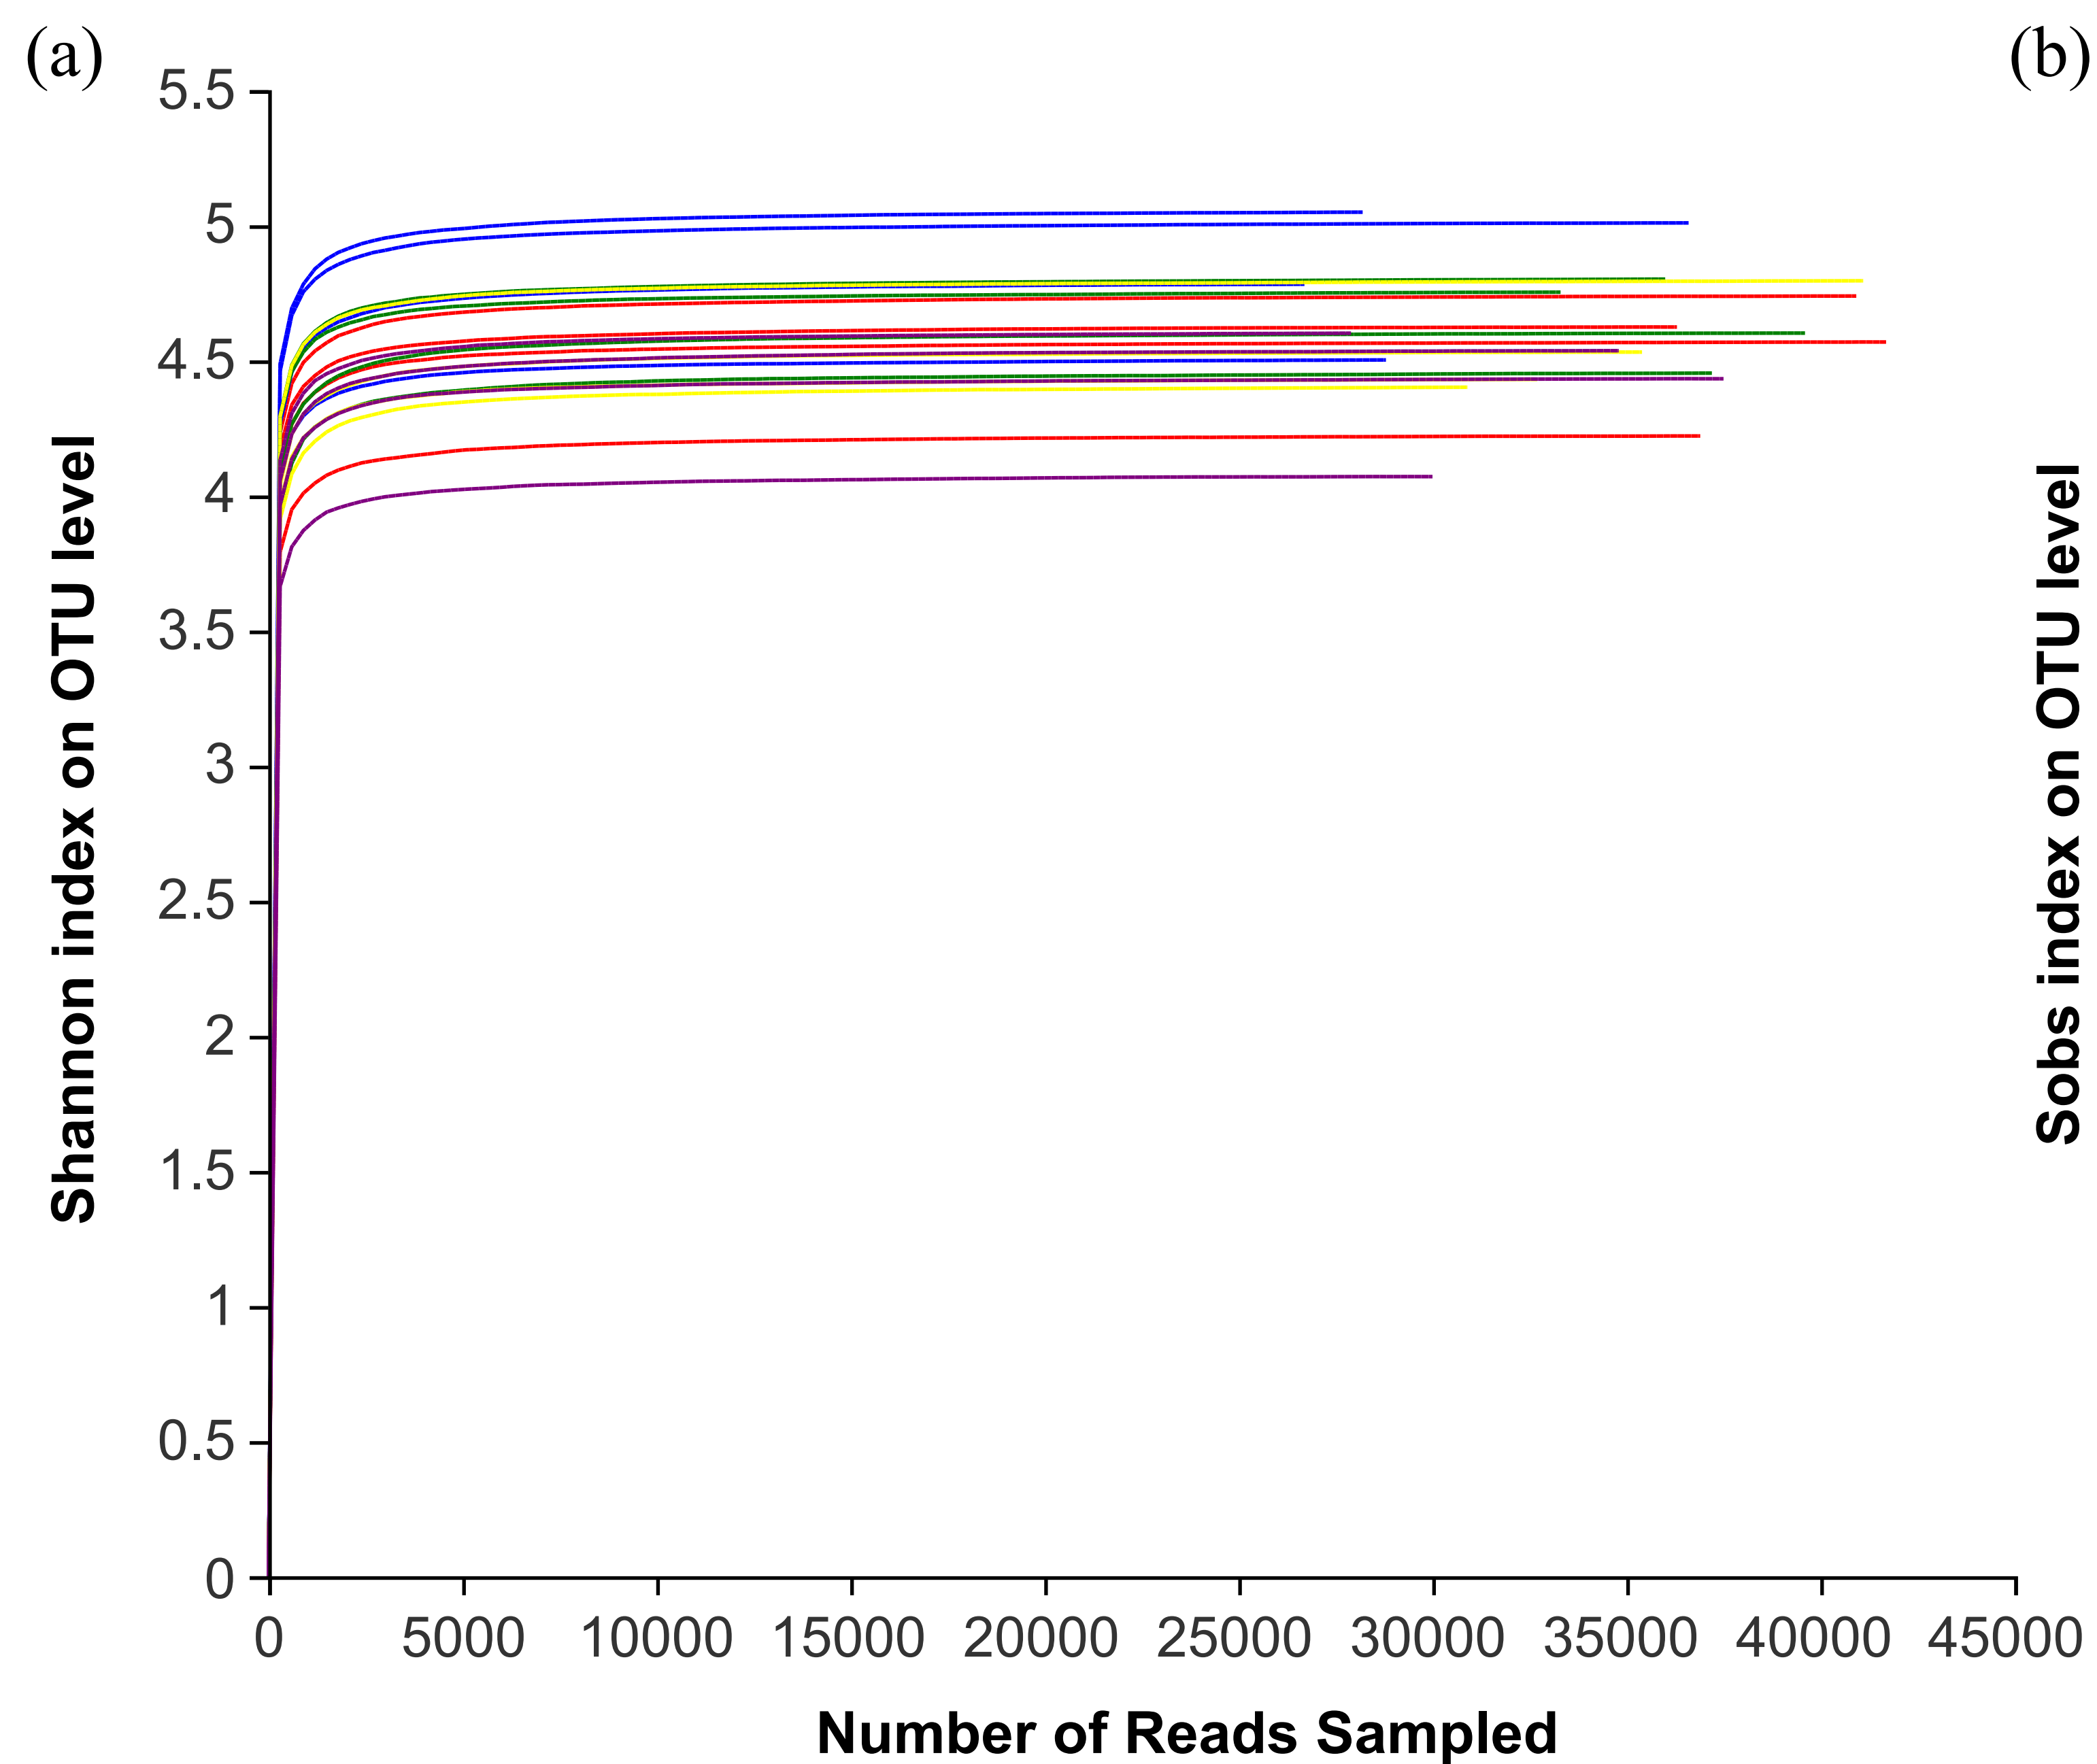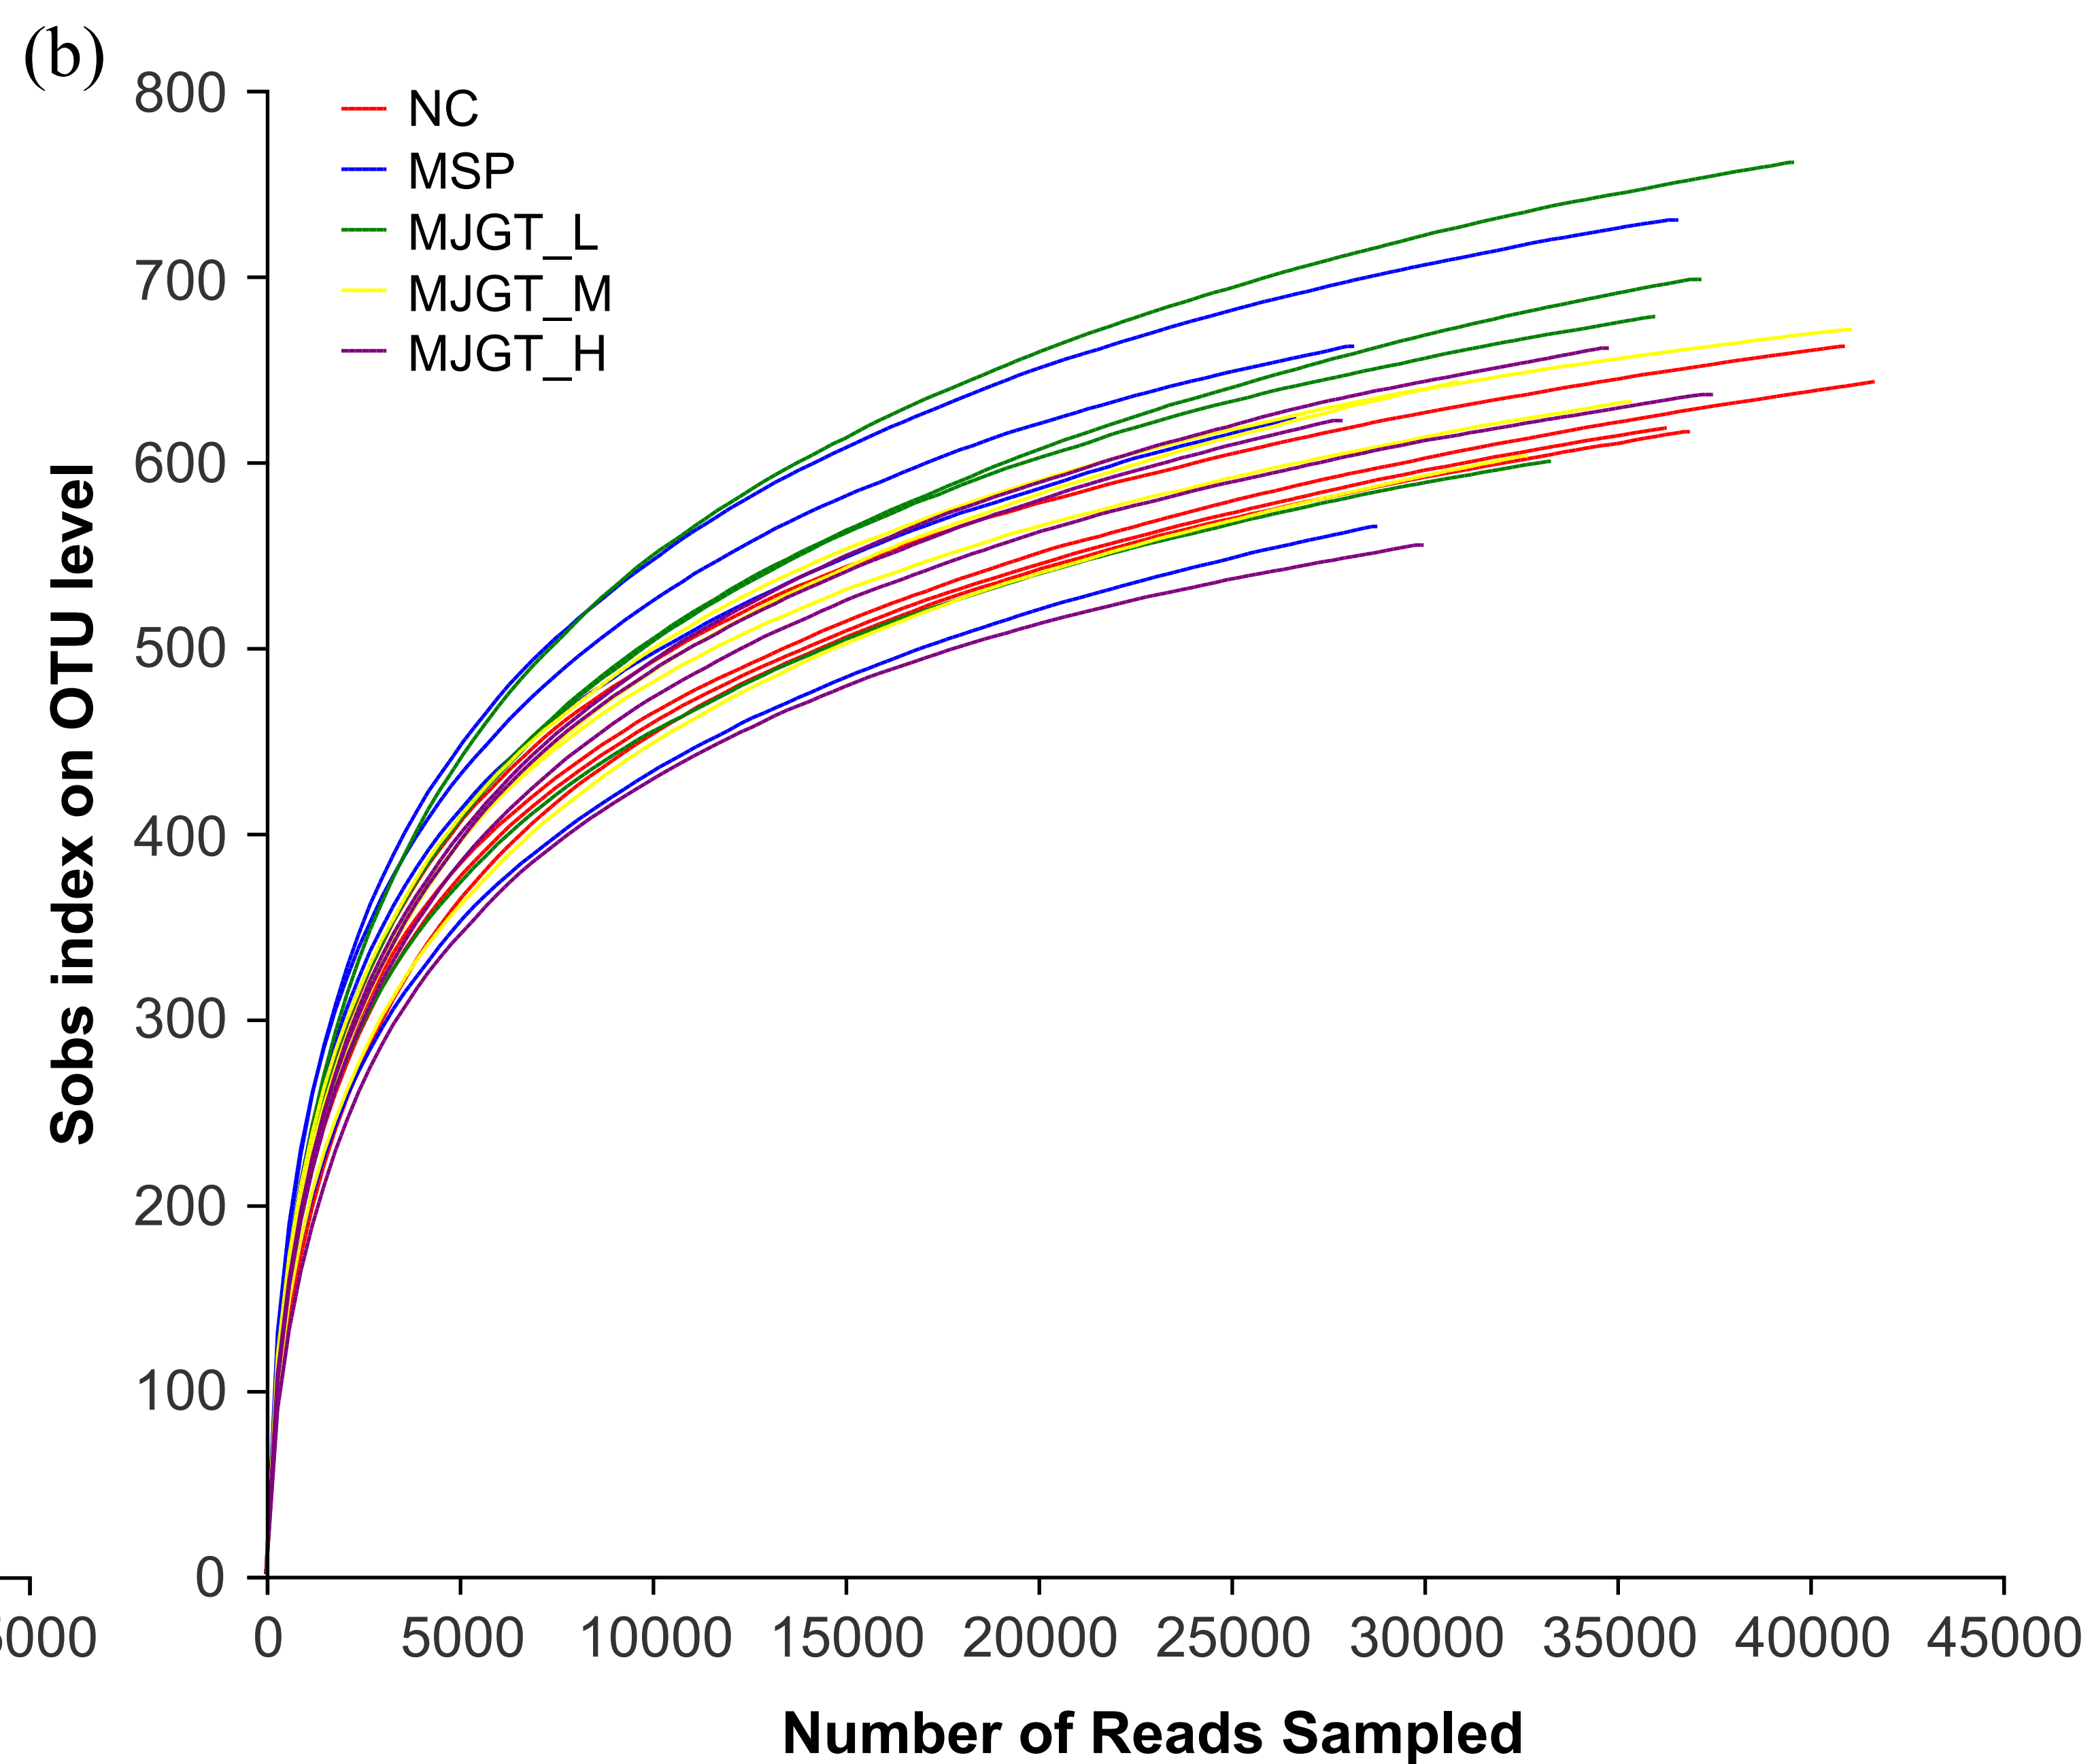

Supplement: s1 [file s1]

RT: 0.00 - 30.01

NL:  
8.89E8  
TIC F: FTMS -  
p ESI Full ms  
[100.0000-  
1500.0000]  
MS W1

Relative Abundance

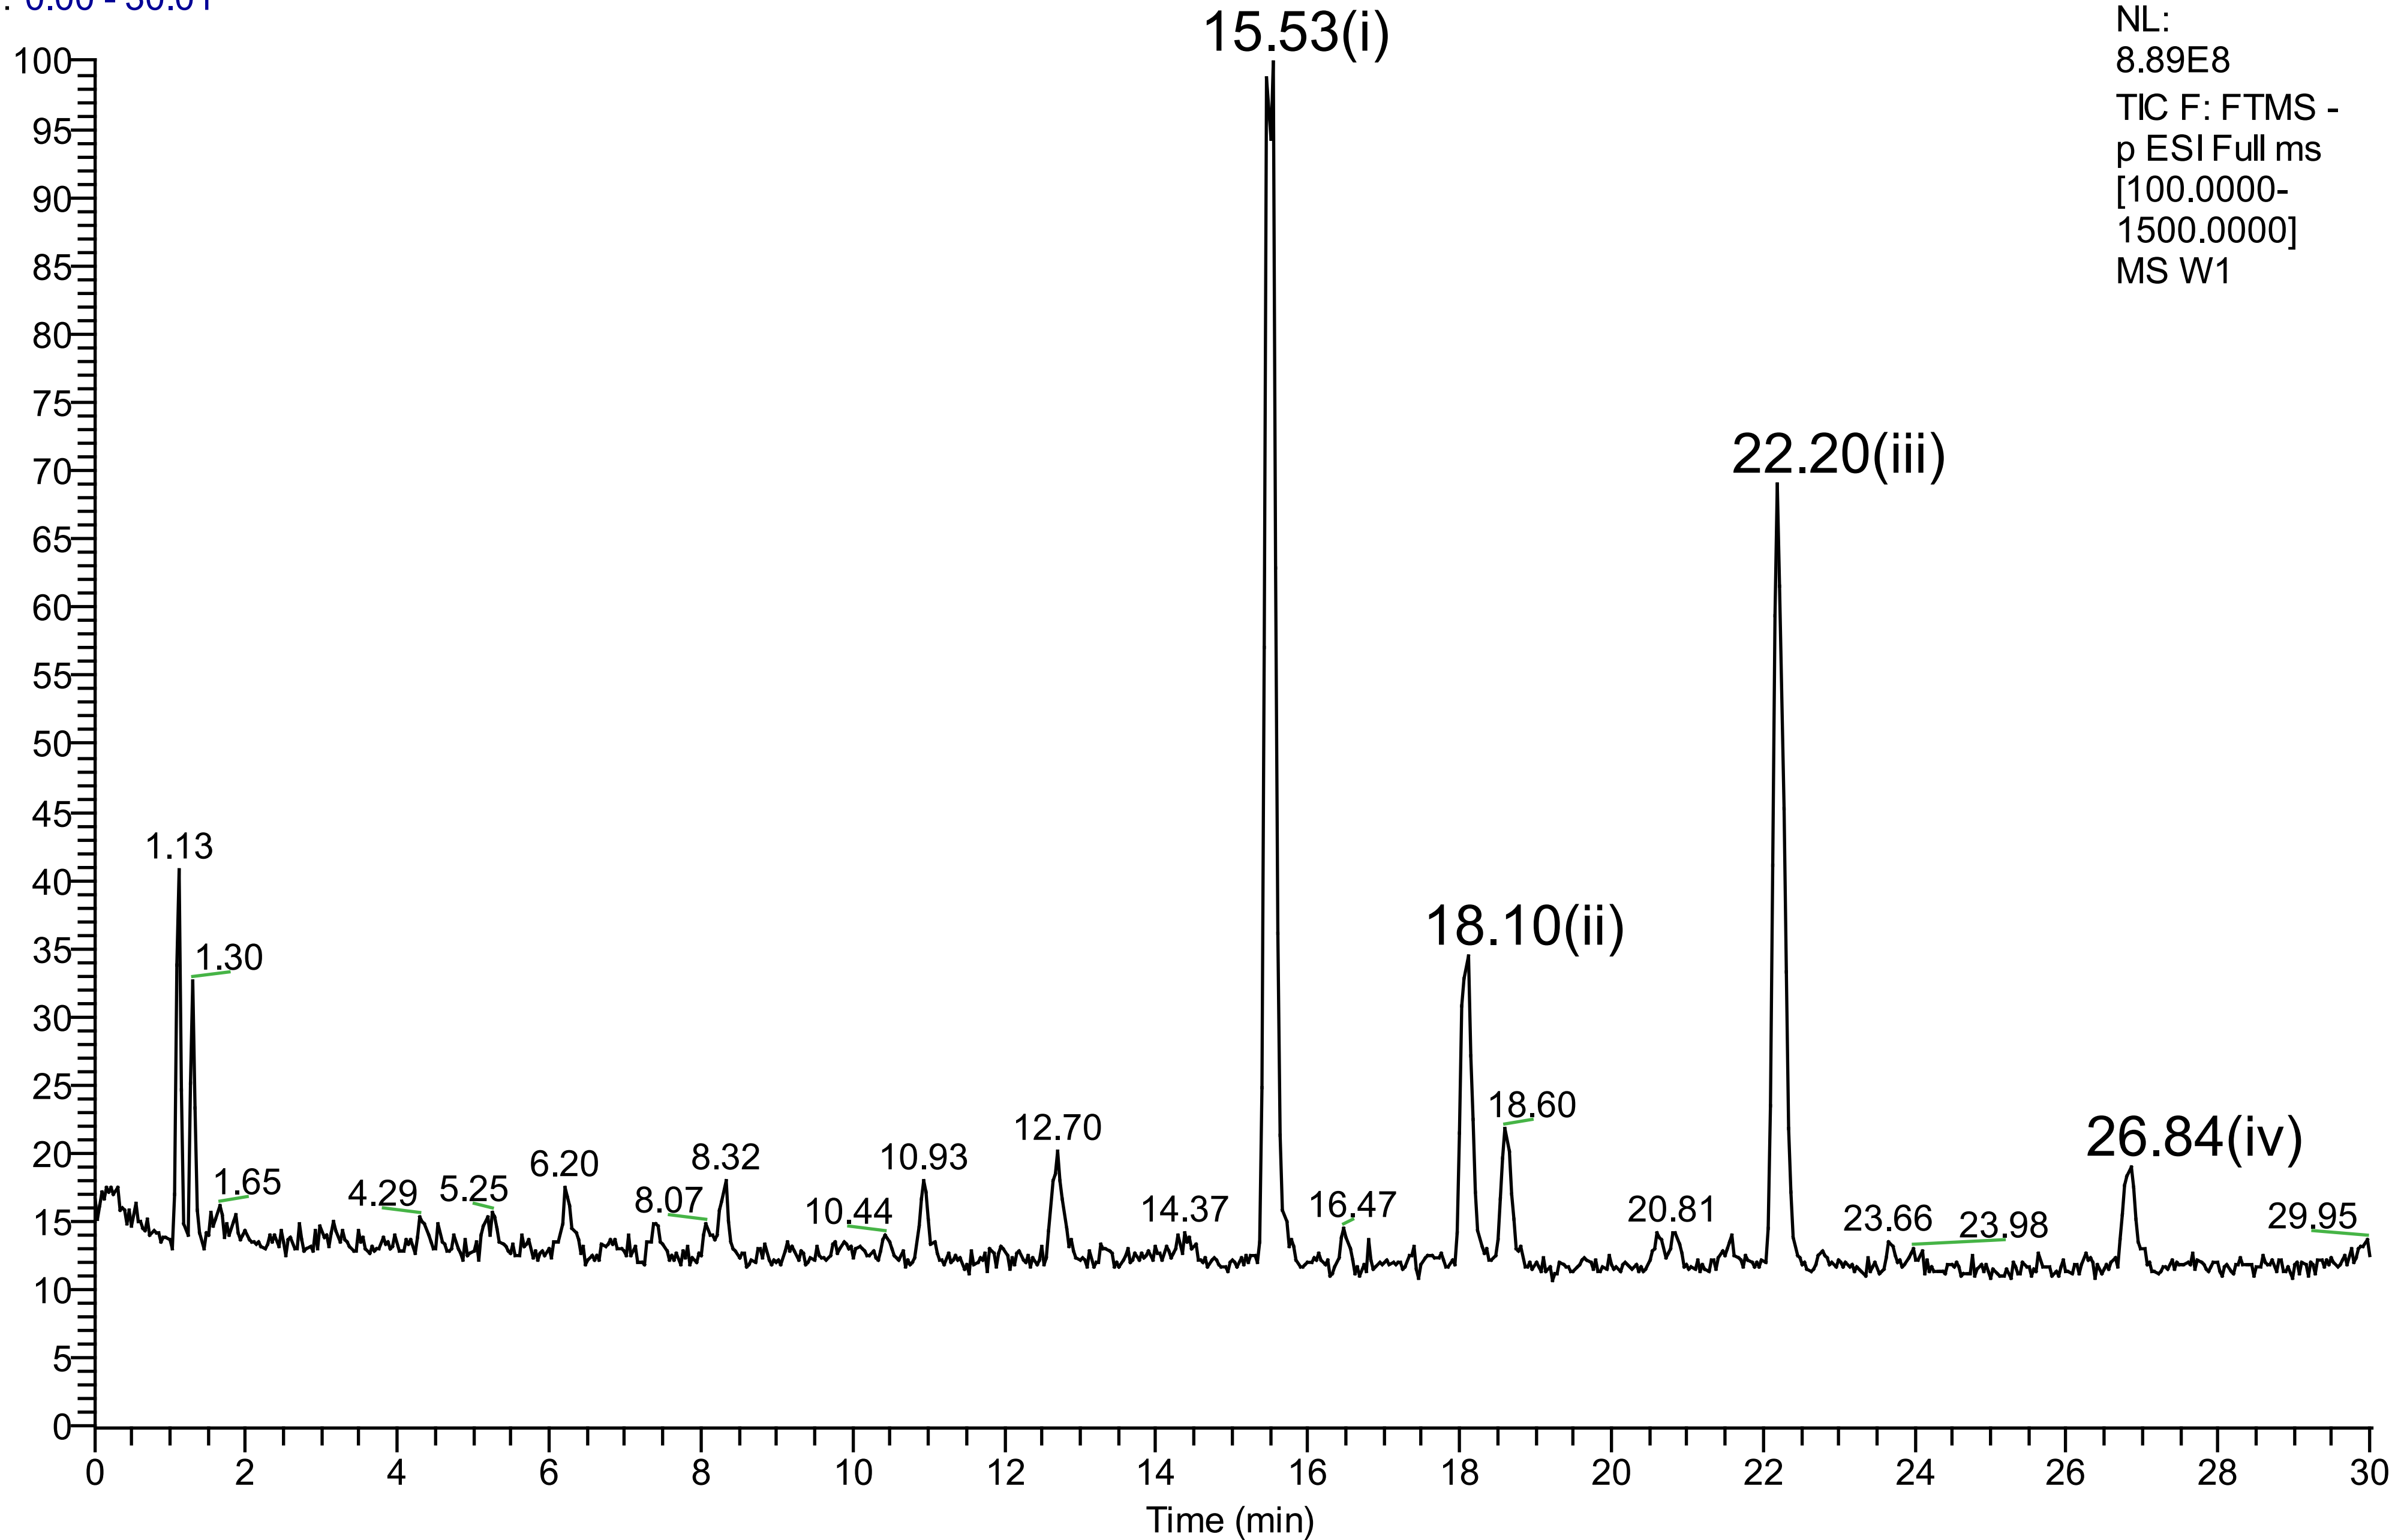

Supplement: s1 [file s1]

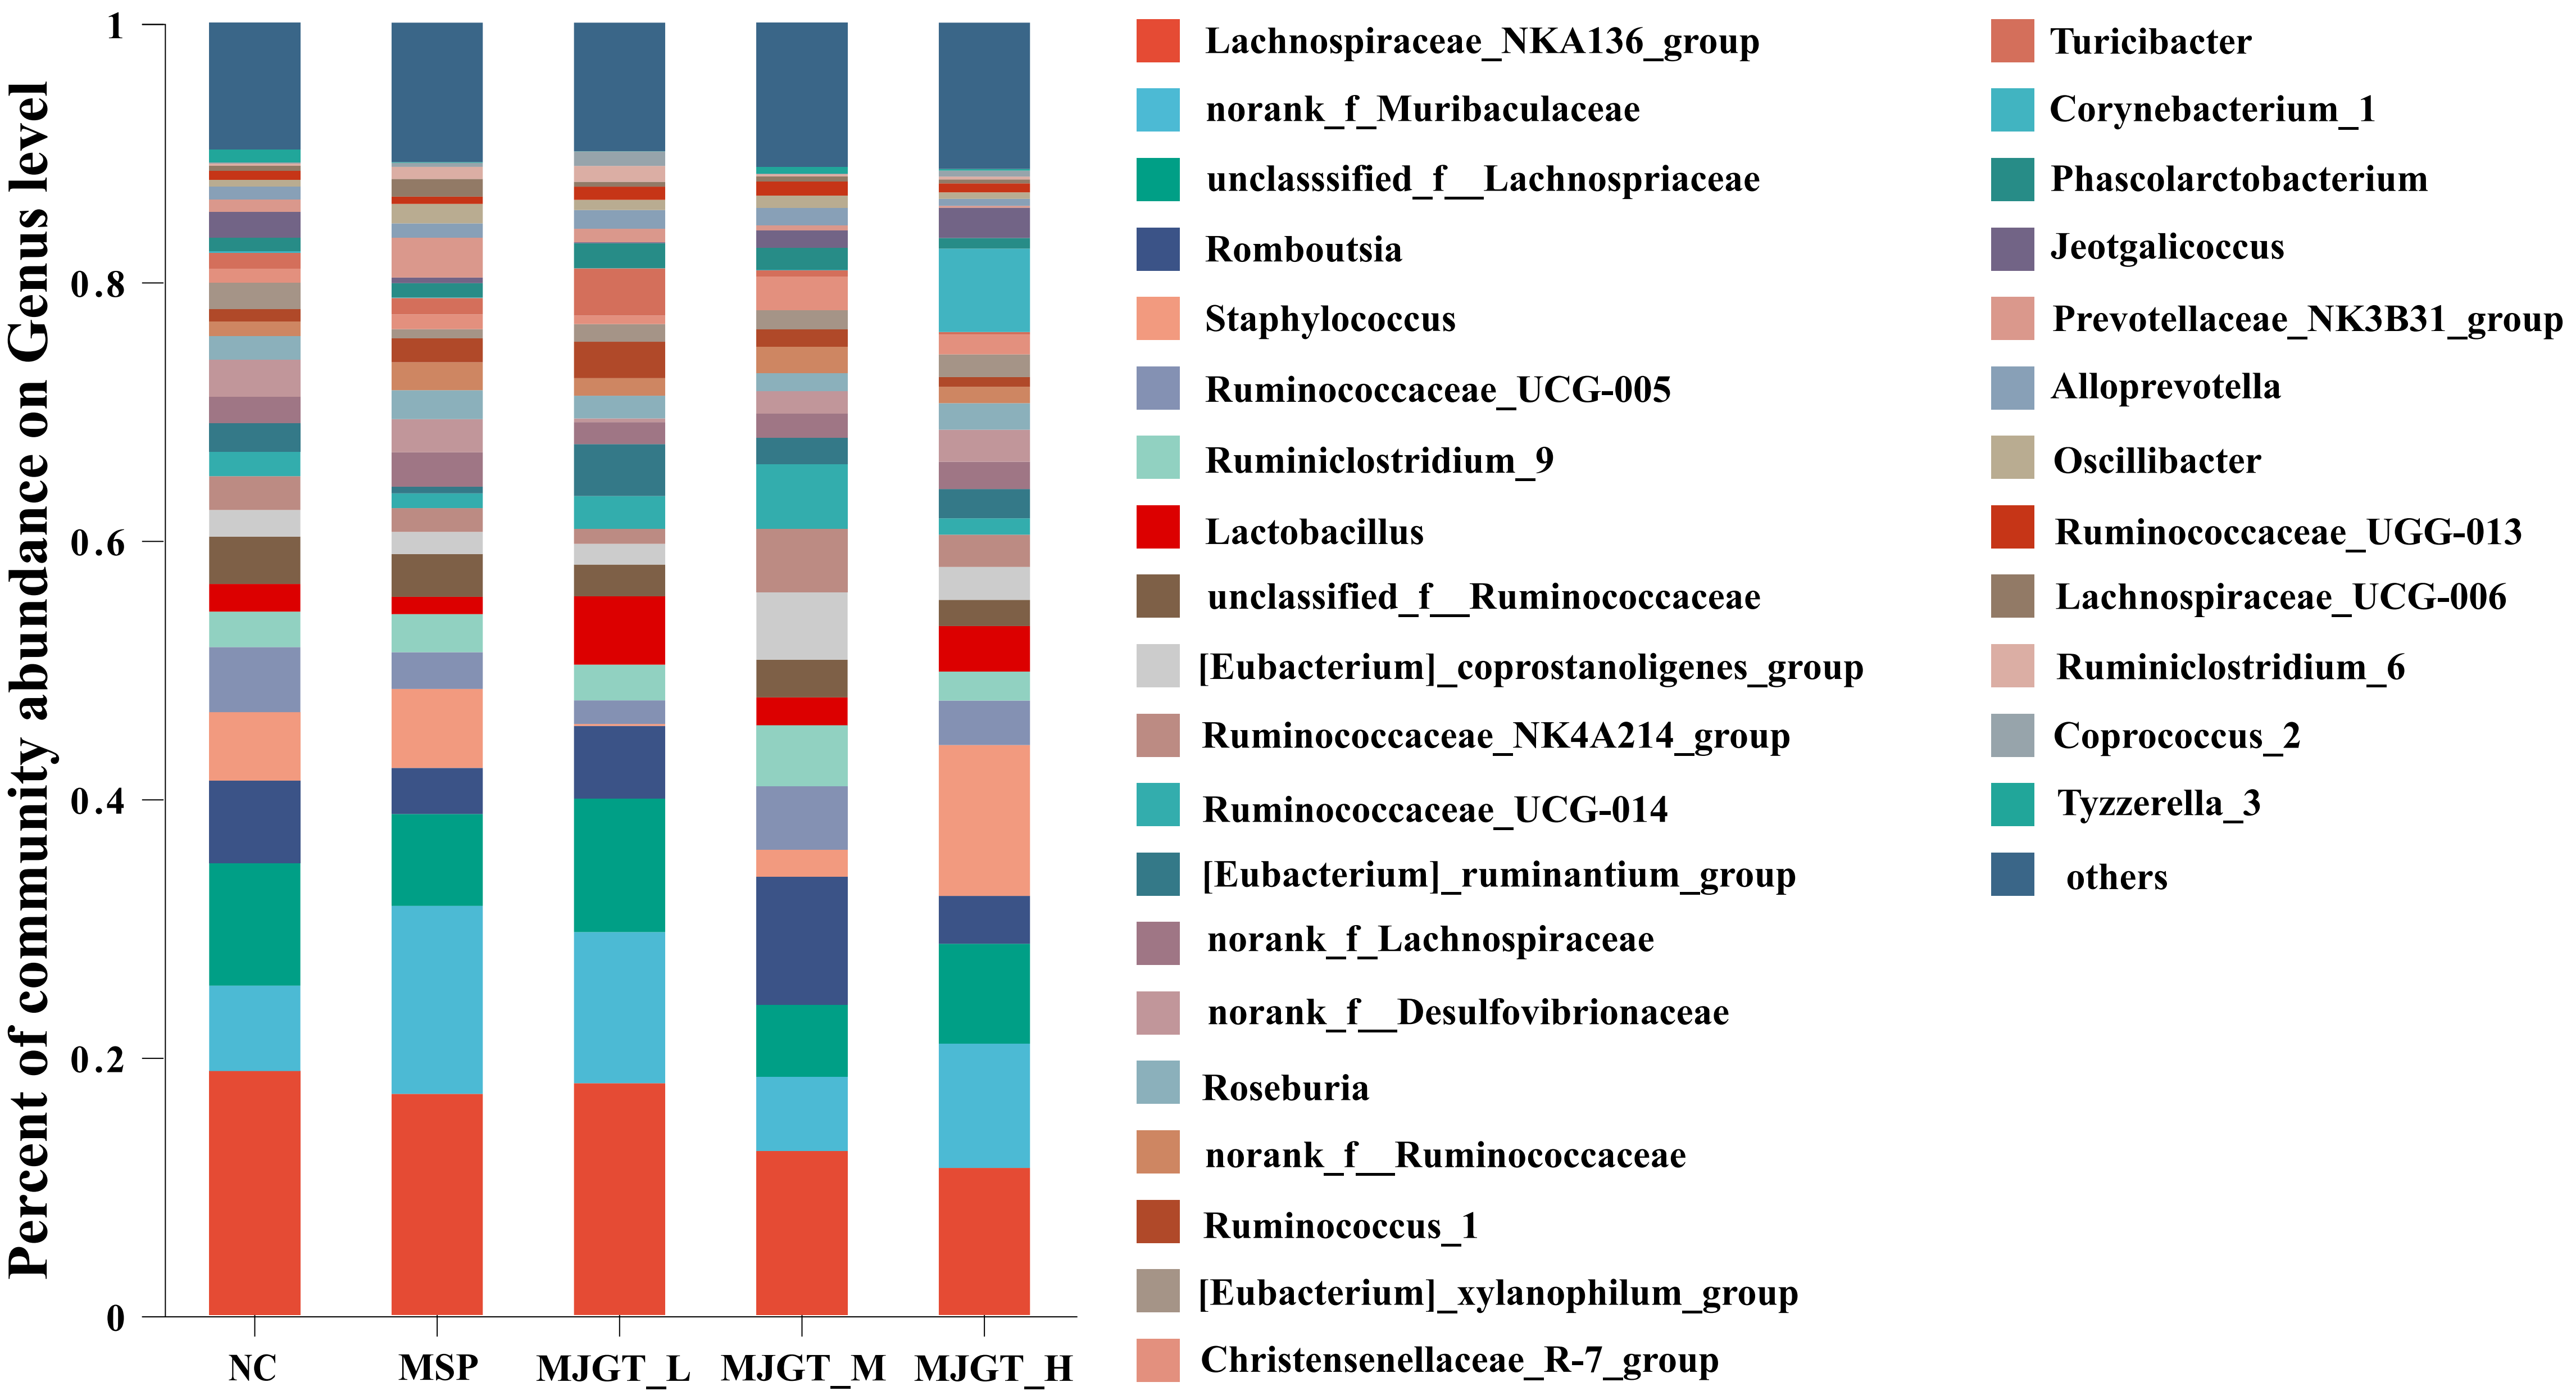

Supplement: s1 [file s1]

(a)

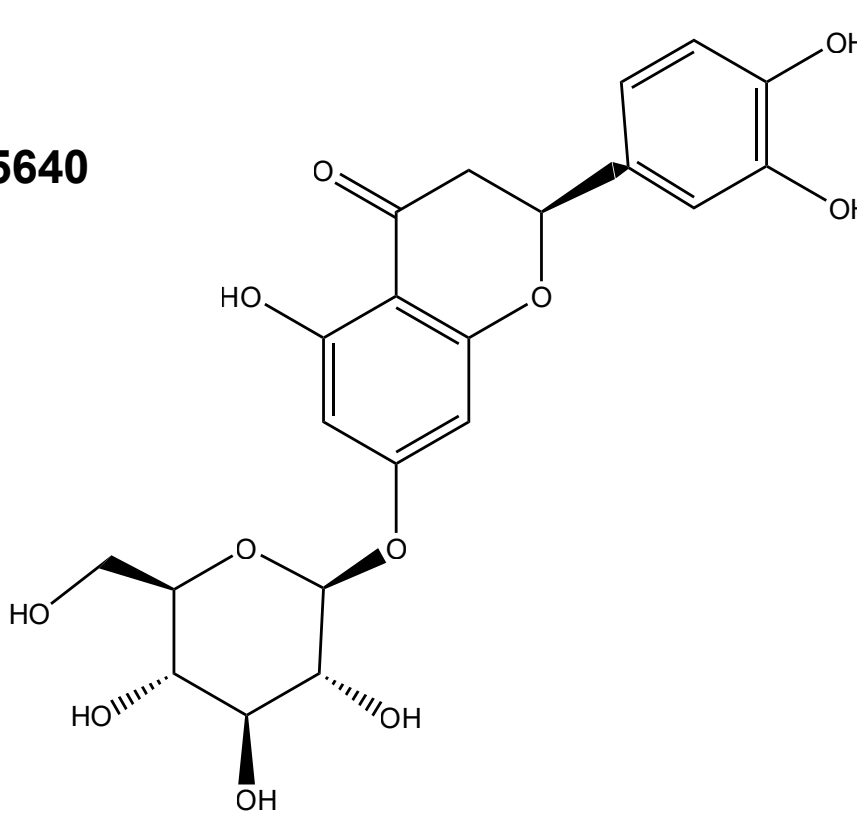

(b)

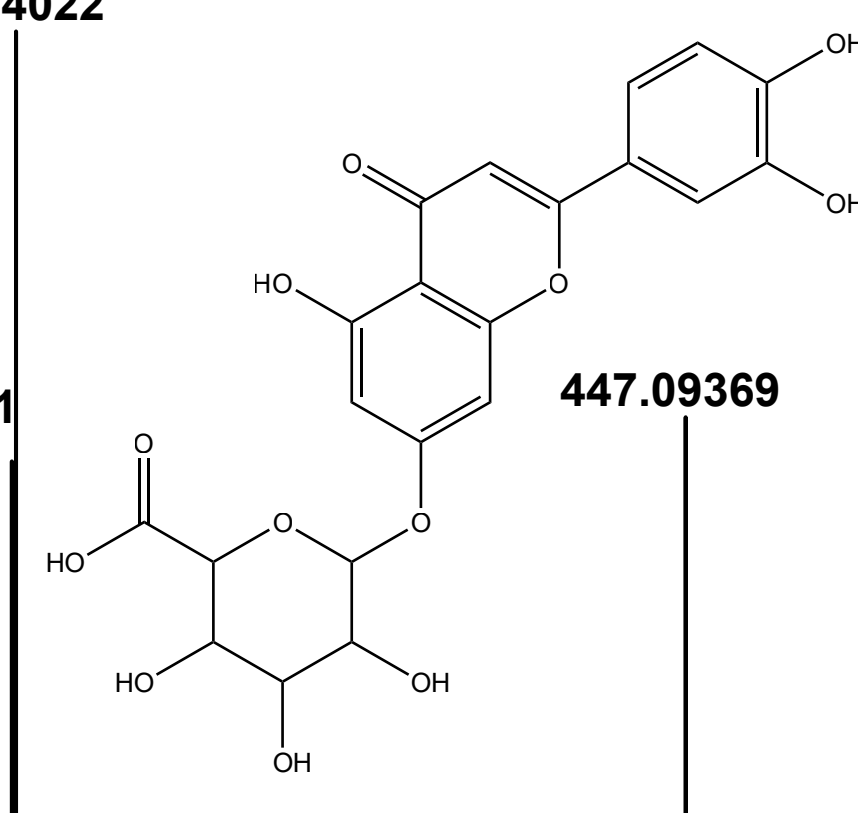

(c)

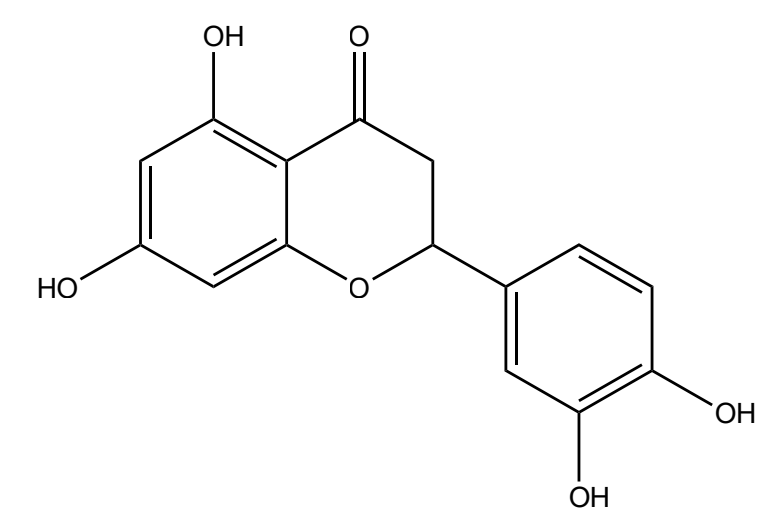

(c)

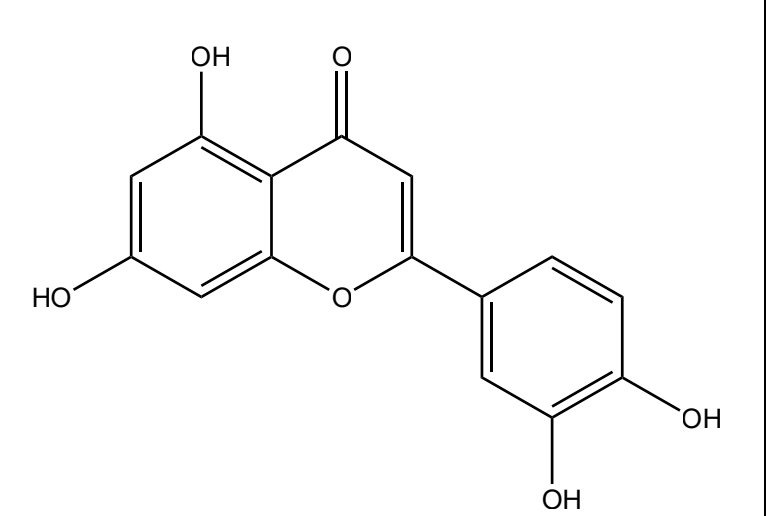

Supplement: s1 [file s1]

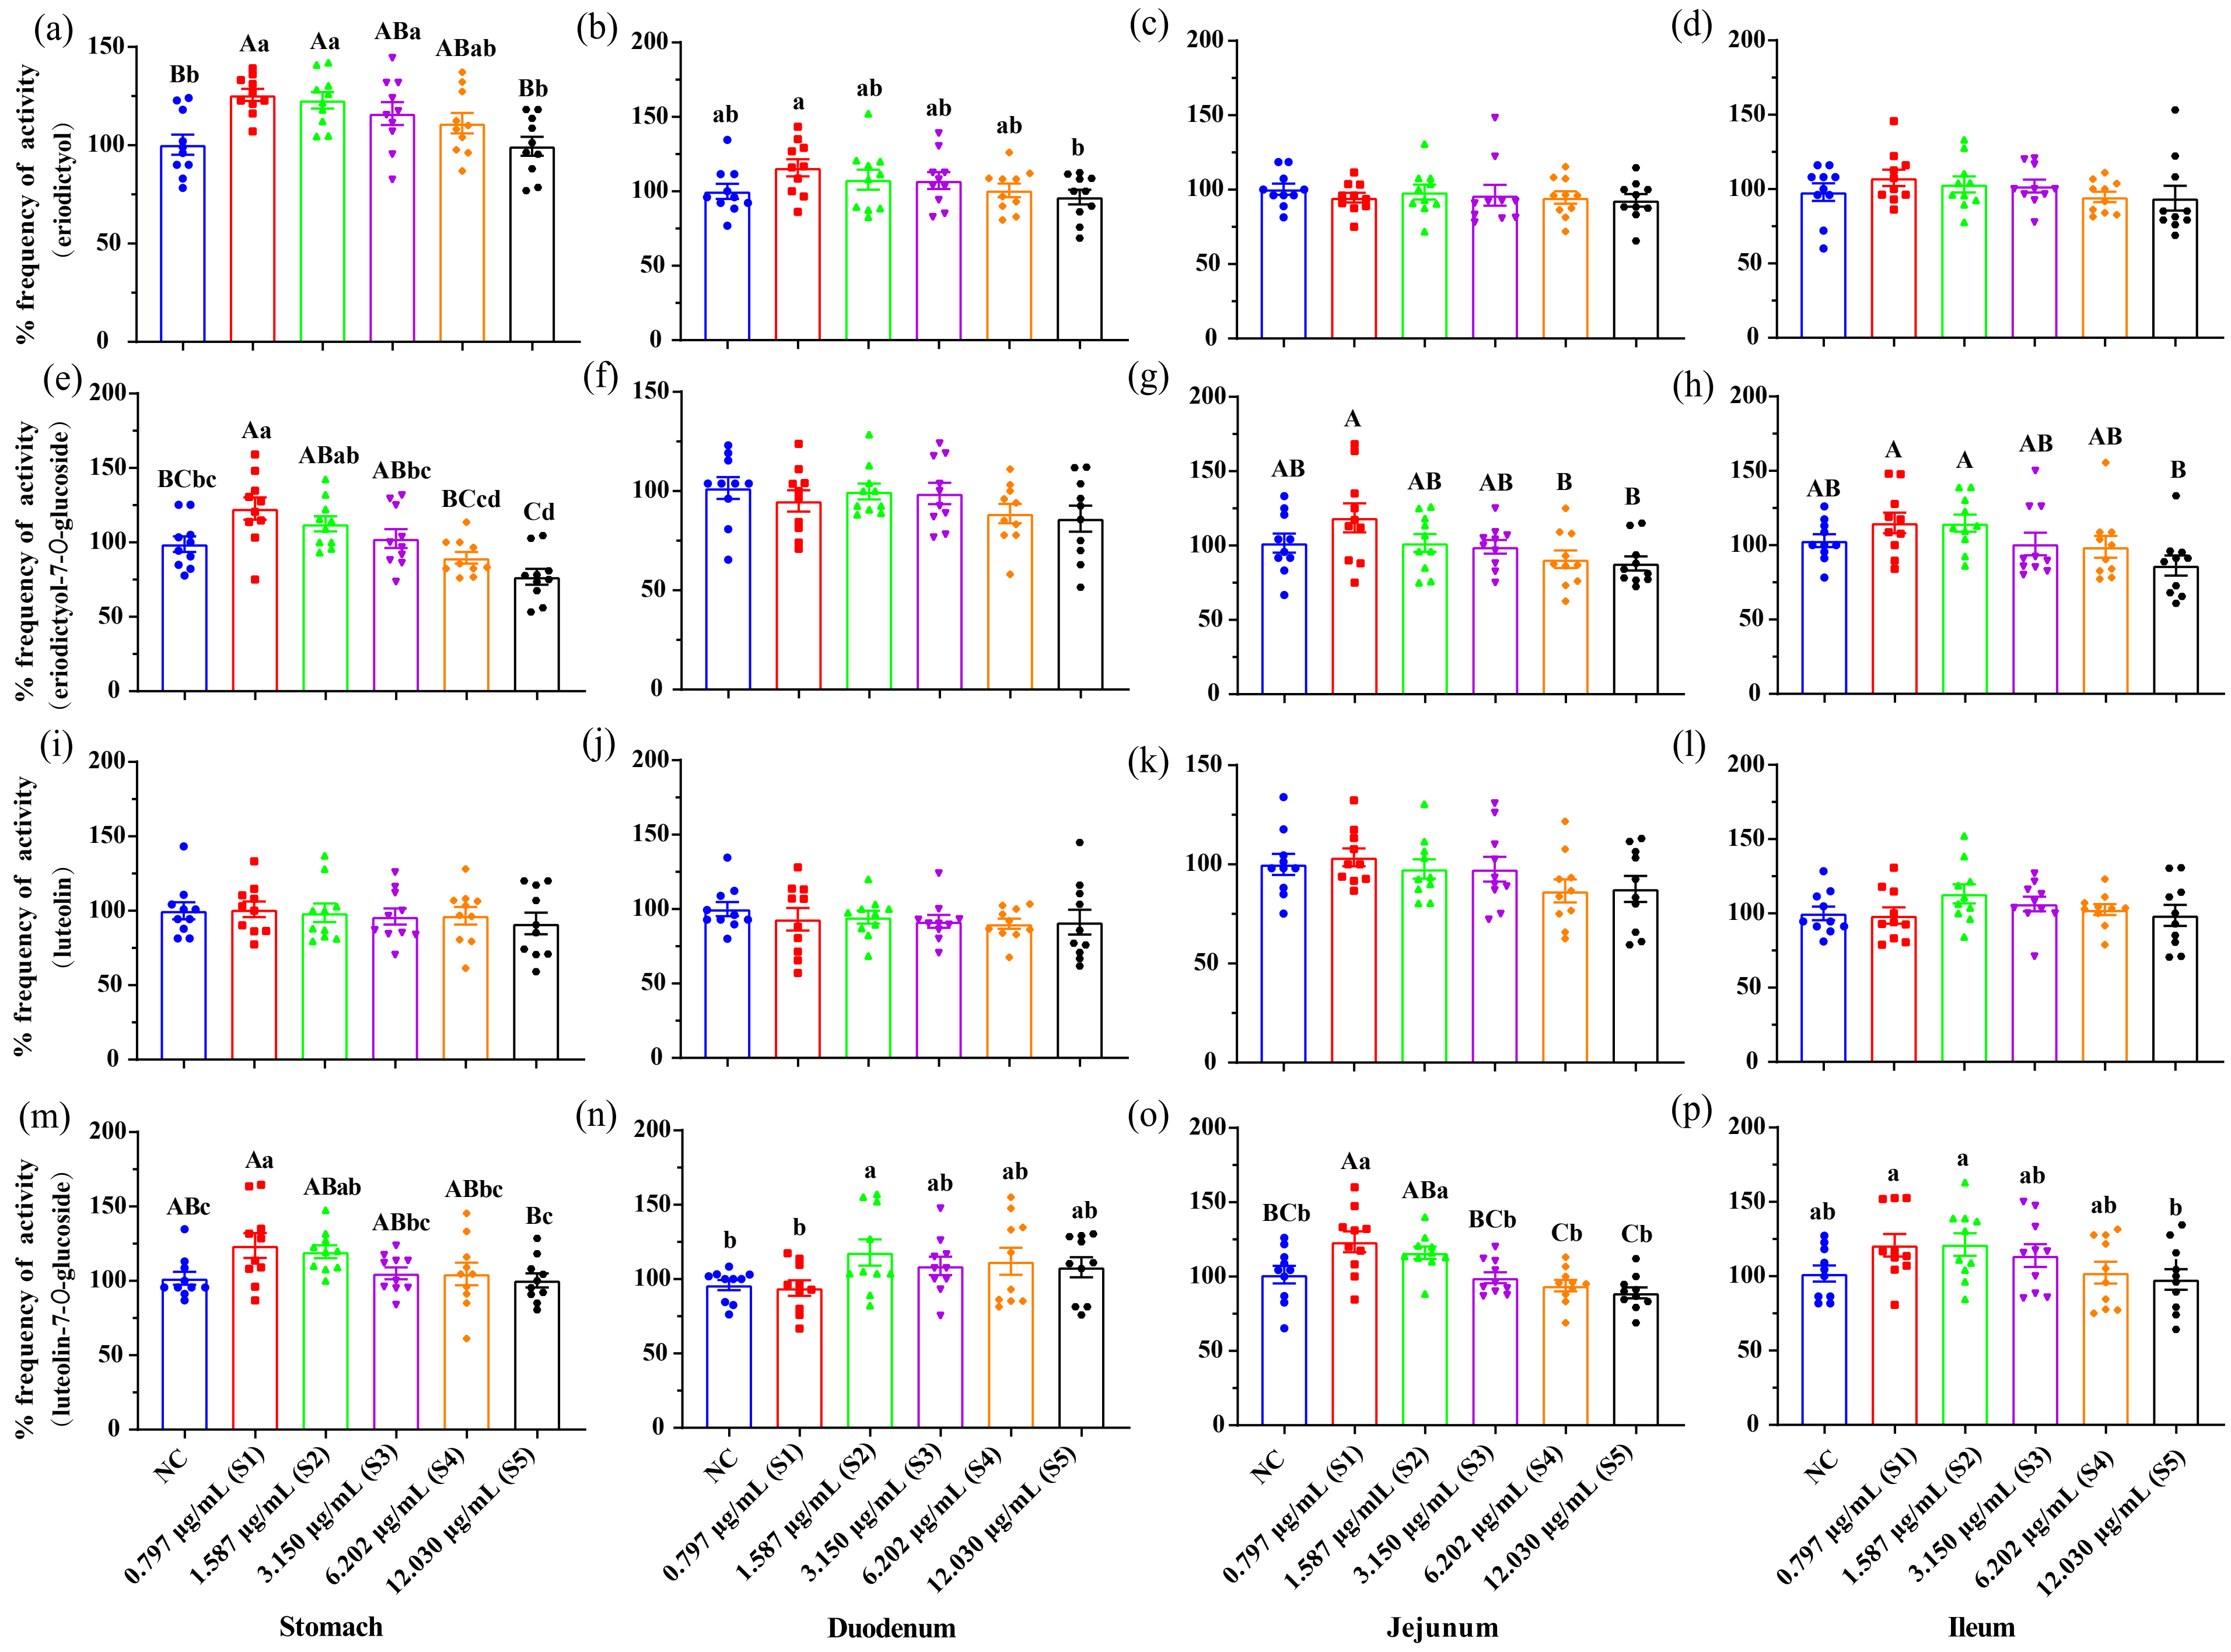

Supplement: s1 [file s1]
